# Supplementary material
Source: PubMed Central journal article supplement (PMC2835816)

# Supplementary Figure 1

**A**

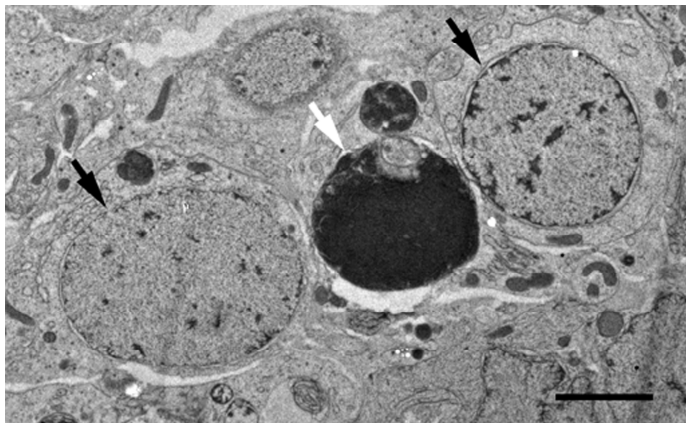

**B**

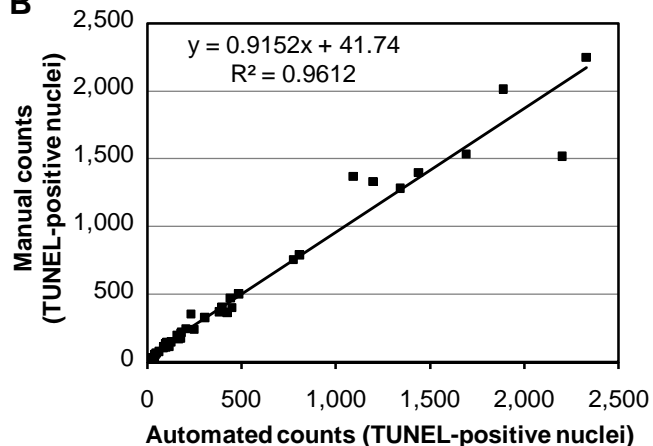

**C**

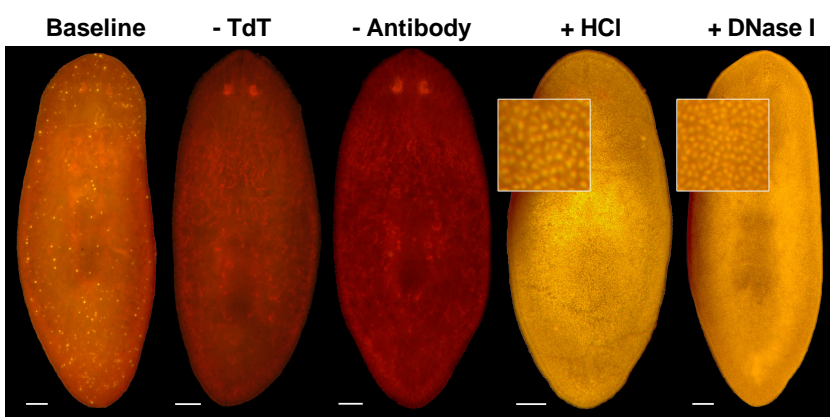

**E**

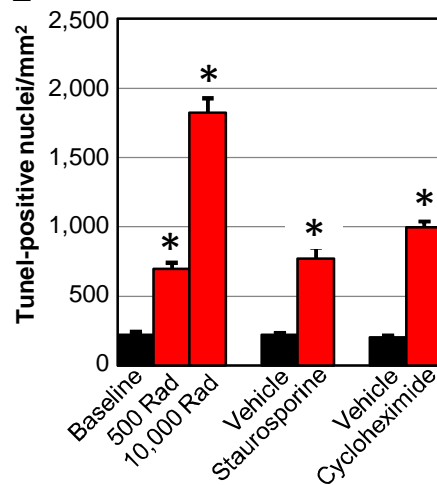

**D**

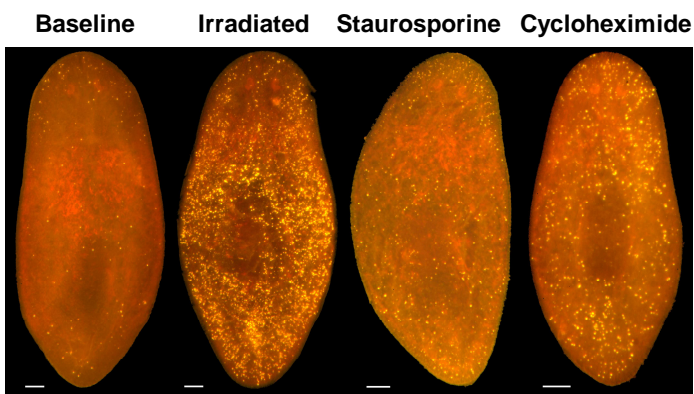

**F**

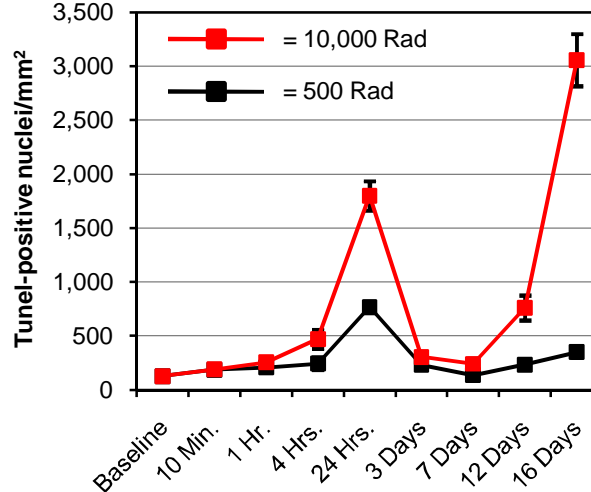

Supplement: NIHMS173060-supplement-03.pdf [file NIHMS173060-supplement-03.pdf]

# Supplementary Figure 2

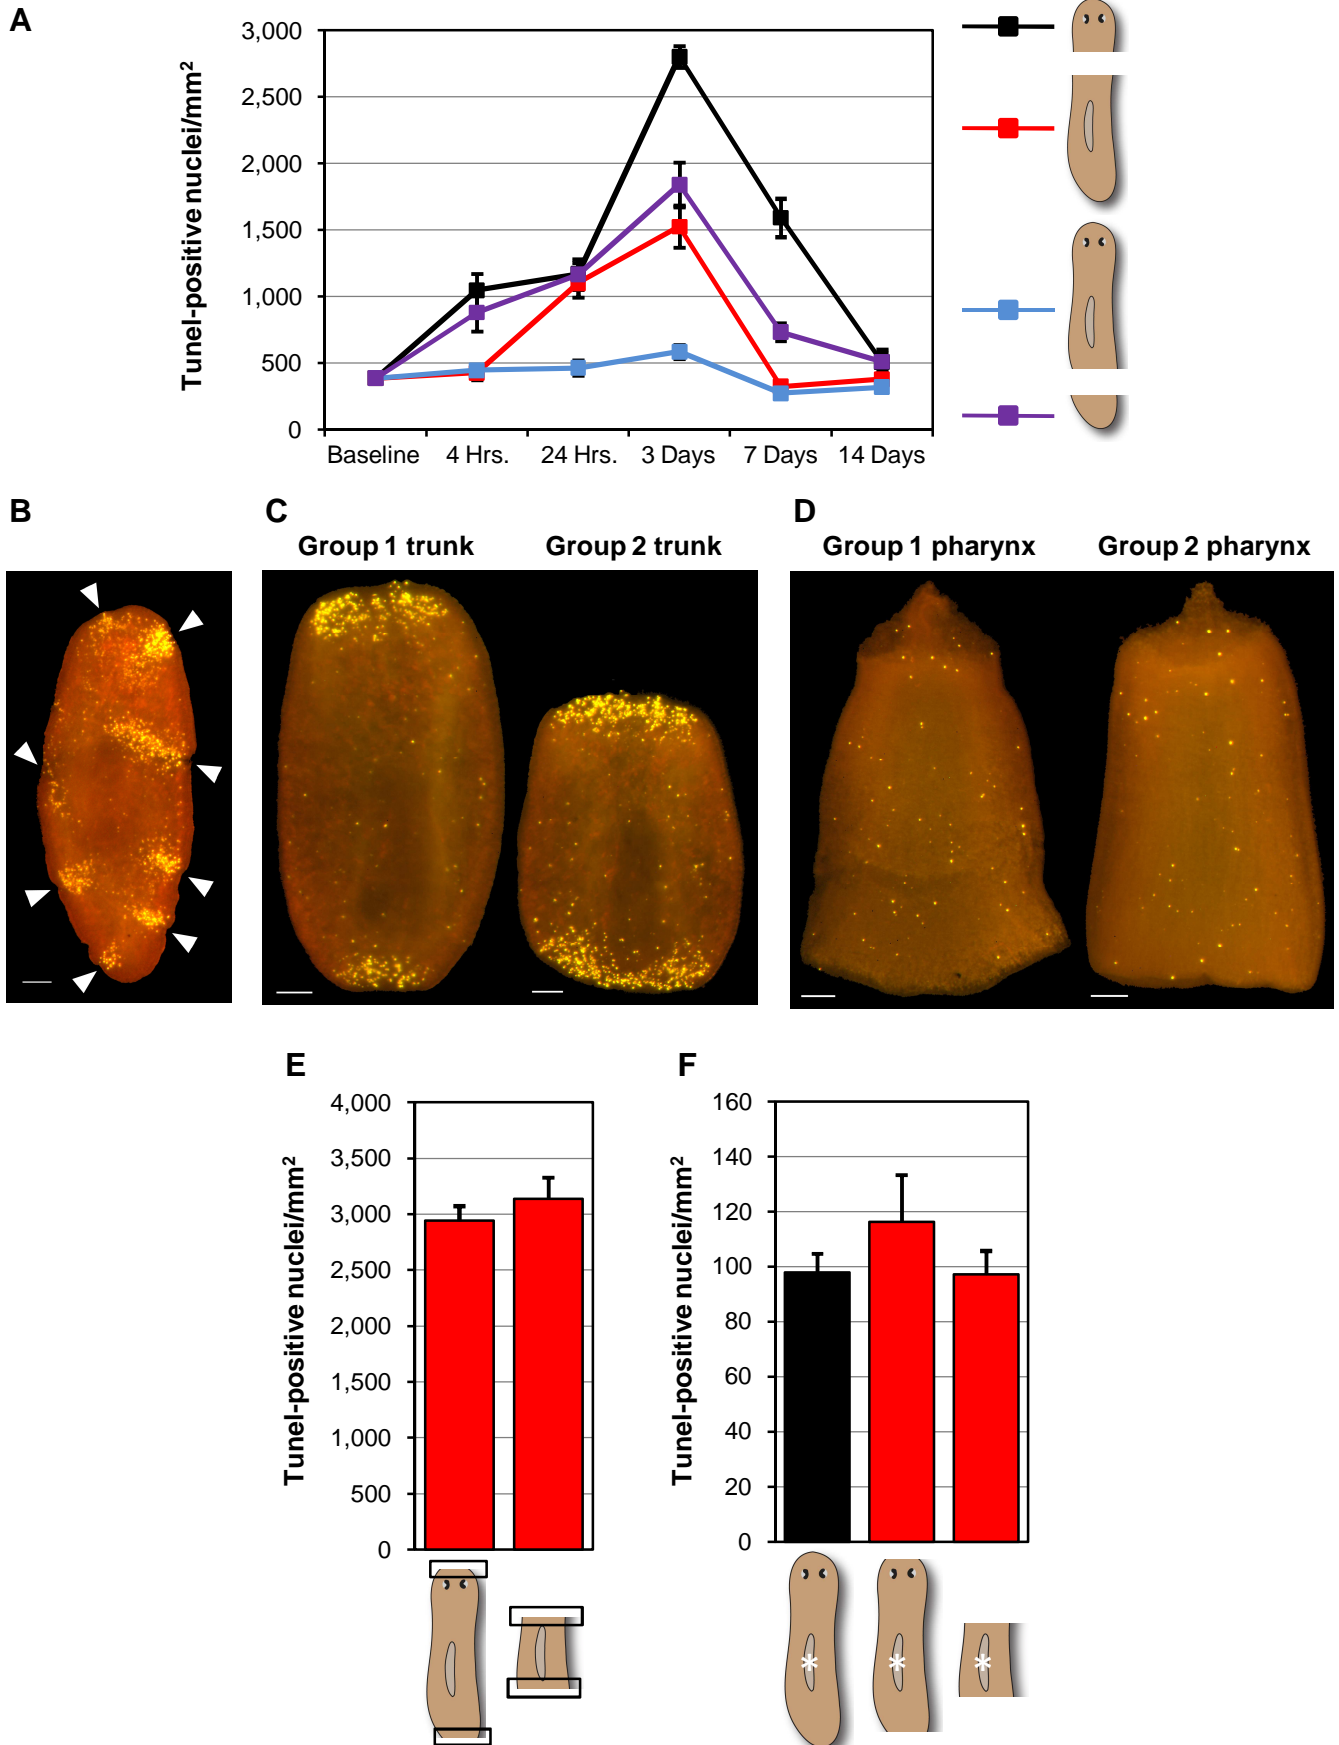

Supplement: NIHMS173060-supplement-04.pdf [file NIHMS173060-supplement-04.pdf]
